# Supplementary material for: A new metal–organic framework constructed from cationic nodes and cationic linkers for highly efficient anion exchange
Source: Royal Society of Chemistry journal article supplement (doi:10.1039/c8cc01225c), 2018-01-01
Supplement: c8cc01225c1.pdf [file c8cc01225c1.pdf]

**Electronic supplementary information for**

**A new metal-organic framework constructed from both**

**cationic node and cationic linker for highly efficient anion**

**exchange**

Mi Zhou,<sup>a,b</sup> Zhanfeng Ju<sup>a</sup> and Daqiang Yuan<sup>\*a</sup>

*<sup>a</sup> State Key Laboratory of Structural Chemistry, Fujian Institute of Research on the Structure of Matter, Chinese Academy of Sciences, Fujian, Fuzhou, 350002, China*

*<sup>b</sup> University of Chinese Academy of Sciences, Beijing 100049, People's Republic of China*

**Table of contents**

|                                                                           |     |
|---------------------------------------------------------------------------|-----|
| Materials and Instrumentation .....                                       | S2  |
| Synthesis of $H_2L^{2+}(NO_3)_2$ .....                                    | S2  |
| Synthesis of FJI-Y6.....                                                  | S5  |
| Single-crystal X-ray data .....                                           | S6  |
| Dyes adsorption and release experiment.....                               | S8  |
| UV-Vis absorption spectra changes of dyes in presence of FJI-Y6 .....     | S10 |
| Photo, IR, UV-Vis spectrum and PXRD of FJI-Y6 after dyes adsorption ..... | S15 |
| Additional Structure figures.....                                         | S19 |
| Reference .....                                                           | S19 |

## Materials and Instrumentation

Methyl 4-hydroxybenzoate, hexamethylenetetramine, cyclohexane diamine,  $\text{In}(\text{NO}_3)_3 \cdot x\text{H}_2\text{O}$ ,  $\text{Cu}(\text{NO}_3)_2 \cdot 6\text{H}_2\text{O}$ , trifluoroacetic acid (TFA), acetonitrile ( $\text{CH}_3\text{CN}$ ) and *N,N*-dimethylformamide (DMF) were commercially available and used as received.  $^1\text{H}$  NMR spectra were recorded on a Bruker Avance 400 spectrometer (400.1 MHz for  $^1\text{H}$  NMR). Powder X-ray diffraction (PXRD) data were collected on a Rigaku MiniFlex 600 diffractometer working with Cu  $K\alpha$  radiation, and the recording speed was  $3^\circ \text{ min}^{-1}$  over the  $2\theta$  range of  $4\text{--}50^\circ$  at room temperature. Crystal structure data were collected on a SuperNova diffractometer equipped with a copper micro-focus X-ray sources ( $\lambda = 1.54184 \text{ \AA}$ ) and an Atlas CCD detector or a Bruker APEX-III CCD diffractometer with graphite-monochromated Cu  $K\alpha$  radiation ( $\lambda = 1.54178 \text{ \AA}$ ). UV-Vis absorption spectra were recorded in a quartz cuvette with a Lambda 365 spectrophotometer. Fourier transform infrared (FT-IR) spectra of the samples were recorded on KBr pellets in the  $400\text{--}4000 \text{ cm}^{-1}$  range using a VERTEX70 spectrometer. Elemental analyses (C, H, N) were performed on an Elementar Vario MICRO elemental analyzer. Thermogravimetric analyses (TGA) were recorded on a NETZSCH STA 449C unit at a heating rate of  $10^\circ \text{ C min}^{-1}$  under a nitrogen atmosphere.

## Synthesis of $\text{H}_2\text{L}^{2+}(\text{NO}_3)_2$

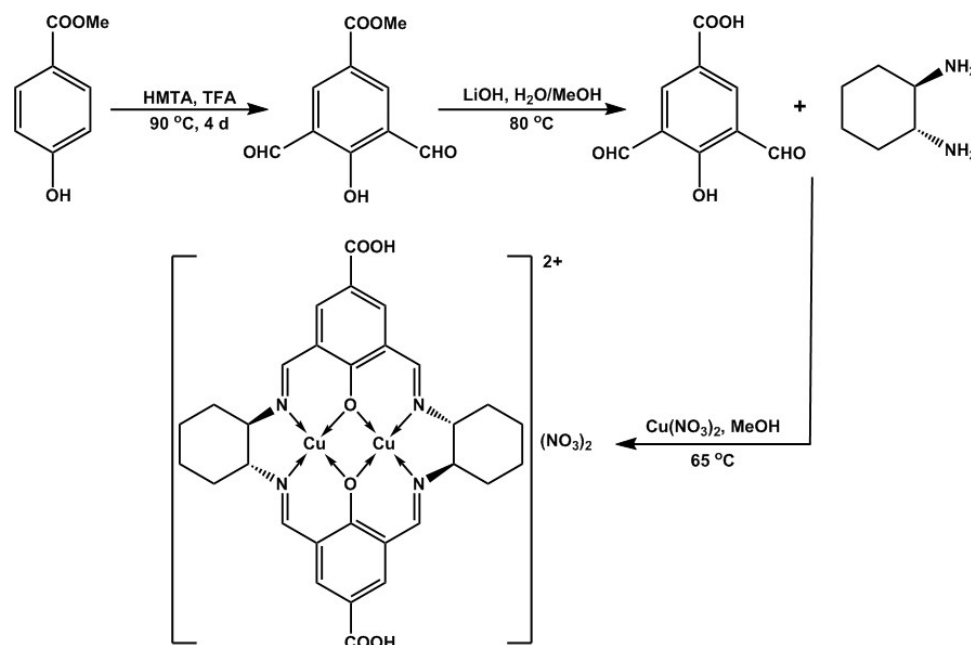

**Scheme S1** the synthetic route of  $\text{H}_2\text{L}^{2+}(\text{NO}_3)_2$

**Methyl 3,5-diformyl-4-hydroxybenzoate** was synthesized according to the literature<sup>1, 2</sup>. Methyl 4-hydroxybenzoate (6.8 g, 44.3 mmol) and

hexamethylenetetramine (25.58 g, 182.5 mmol) were dissolved in 50 mL TFA and the solution was heated at 90 °C for 4 d. Then 300 mL H<sub>2</sub>O was added to the solution and the mixture was heated up to give a homogeneous solution. After cooling, yellow needle-like product crystallized out, dried in vacuum, about 6.5 g, yield (70%). <sup>1</sup>H NMR (400 MHz, CDCl<sub>3</sub>) δ 12.07 (s, 1H), 10.30 (s, 2H), 8.67 (s, 2H), 3.98 (s, 3H).

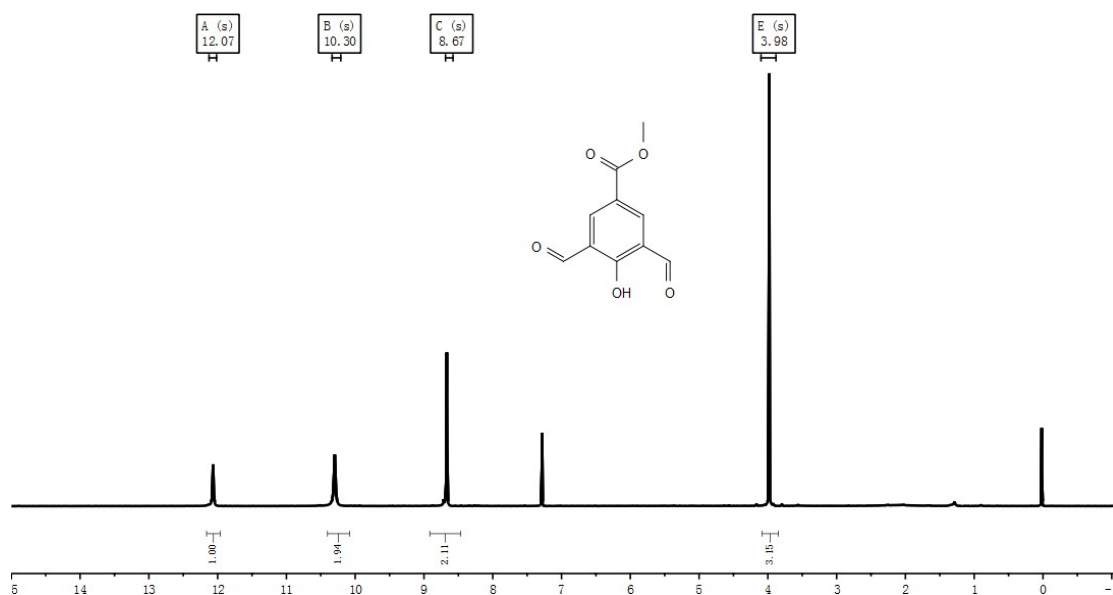

**Figure S1** <sup>1</sup>H NMR spectra of 3,5-diformyl-4-hydroxybenzoate

**3,5-diformyl-4-hydroxybenzoic acid:** 200 mL H<sub>2</sub>O and 50 mL methanol was charged into a 500 mL bottle containing 2.08 g ester and 2 g LiOH, the mixture was heated at 80 °C overnight. Then the yellow solution was evaporated most of the methanol by rotary evaporation, aqueous HCl solution was added subsequently to adjusted the pH to 2 and the precipitate was filtered out and dried at vacuum, about 1.85 g, yield (95%). <sup>1</sup>H NMR (400 MHz, DMSO) δ 10.28 (s, 2H), 8.52 (s, 2H).

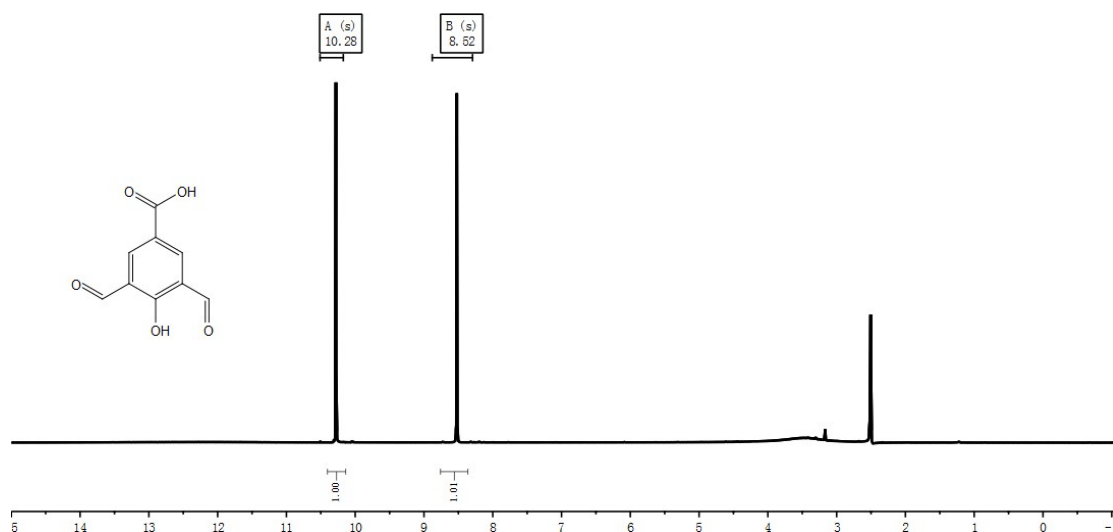

**Figure S2** <sup>1</sup>H NMR spectra of 3,5-diformyl-4-hydroxybenzoic acid

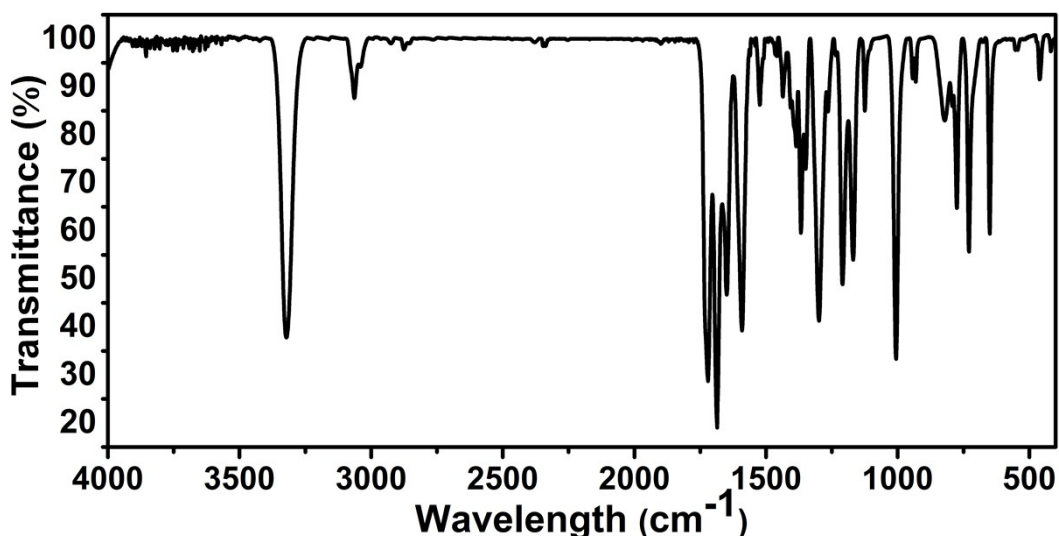

**Figure S3** IR spectrum of 3,5-diformyl-4-hydroxybenzoic acid. The peak at 3323  $\text{cm}^{-1}$  indicates the presence of phenolic hydroxyl. Peak near 3071  $\text{cm}^{-1}$  corresponds to the O-H of carboxylic acid. The peaks at 1723  $\text{cm}^{-1}$ , 1693  $\text{cm}^{-1}$  and 648  $\text{cm}^{-1}$  indicate the presence of aldehyde group.

**$\text{H}_2\text{L}^{2+}(\text{NO}_3)_2$ :** 19.4 mg aldehyde (0.1 mmol) dissolved in 3 mL ethanol with heat, the mixture of 38 mg  $\text{Cu}(\text{NO}_3)_2 \cdot 6\text{H}_2\text{O}$  (1.3 equiv.) and 11.4 mg (1*R*,2*R*)-cyclohexane diamine (1 equiv.) in 2 mL ethanol was added, heated in a sealed vial at 65 °C without stir for 7 d, black needle-like crystal appeared, about 35 mg, yield (60%). The racemic ligand was synthesized with similar method except the (1*R*,2*R*)-cyclohexane diamine was replaced by racemic one.

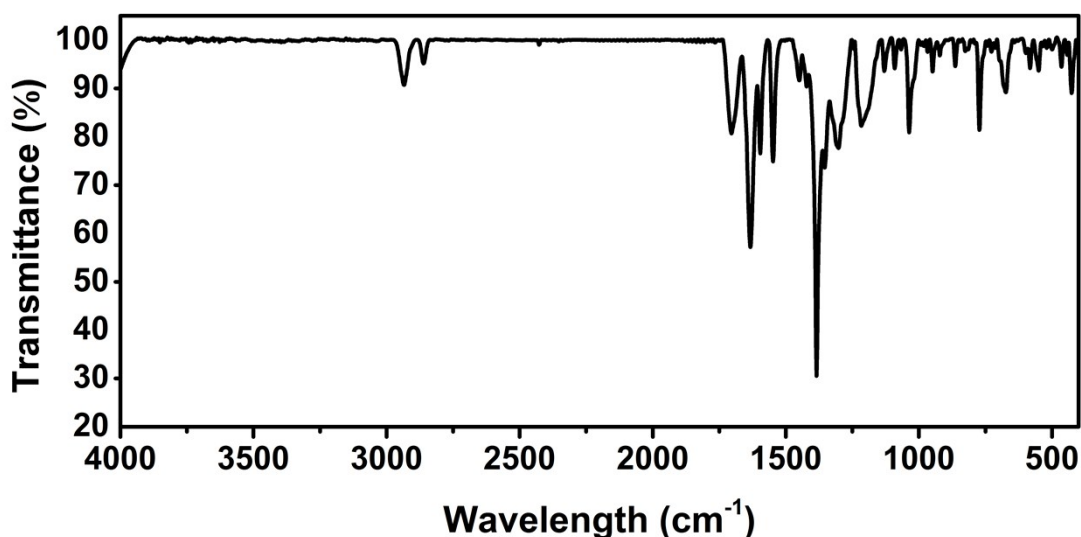

**Figure S4** IR spectrum of  $\text{H}_2\text{L}^{2+}(\text{NO}_3)_2$ . The peaks near 2937  $\text{cm}^{-1}$  and 2855  $\text{cm}^{-1}$  correspond to the C-H of cyclohexane. The peak of 1708  $\text{cm}^{-1}$  indicates the presence of C=O of carboxylic acid. The peak near 1636  $\text{cm}^{-1}$  corresponds to the C=N. The peak near 1380  $\text{cm}^{-1}$  indicates the presence of  $\text{NO}_3^-$ . The peak near 427  $\text{cm}^{-1}$  corresponds to the Cu-O in the ligand.

## Synthesis of FJI-Y6

5 mg ligand and 15 mg  $\text{In}(\text{NO}_3)_3$  was added to a 10 mL vial contain 1 mL DMF and 1 mL  $\text{CH}_3\text{CN}$ , then 20  $\mu\text{L}$   $\text{HBF}_4$  was added into the mixture, the vial was sealed and placed in an 80  $^\circ\text{C}$  oven for 3 d, black prism crystals of **FJI-Y6** was harvested by decanted the solution, yield (40%) according to the ligand. Elemental analysis for  $\text{C}_{180}\text{H}_{180}\text{N}_{24}\text{O}_{44}\text{Cu}_{12}\text{In}_6 \cdot 14\text{NO}_3^- \cdot 34\text{H}_2\text{O}$ : calc.(%): C: 34.24 H: 3.96 N: 8.43; found(%): C: 34.29 H: 4.07 N: 8.32. *rac*-**FJI-Y6** was synthesized with similar method except racemic ligand was employed. **FJI-Y6** dye was harvested by immersing **FJI-Y6** in 10 mL DMF contain 17.5 mg (50  $\mu\text{mol}$ ) AO7 for 2 d.

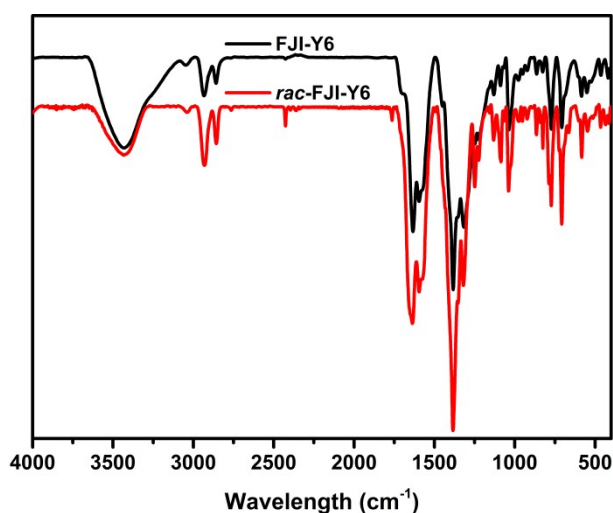

**Figure S5** FT-IR spectrum of FJI-Y6, *rac*-FJI-Y6: the broad peak at 3429  $\text{cm}^{-1}$  corresponds to the O-H of  $\text{H}_2\text{O}$ . Peaks near 2940  $\text{cm}^{-1}$  and 2858  $\text{cm}^{-1}$  correspond to the C-H of cyclohexane in the ligand. The peak near 1639  $\text{cm}^{-1}$  corresponds to the C=N of the ligand. The peak near 1382  $\text{cm}^{-1}$  indicates the presence of  $\text{NO}_3^-$ .

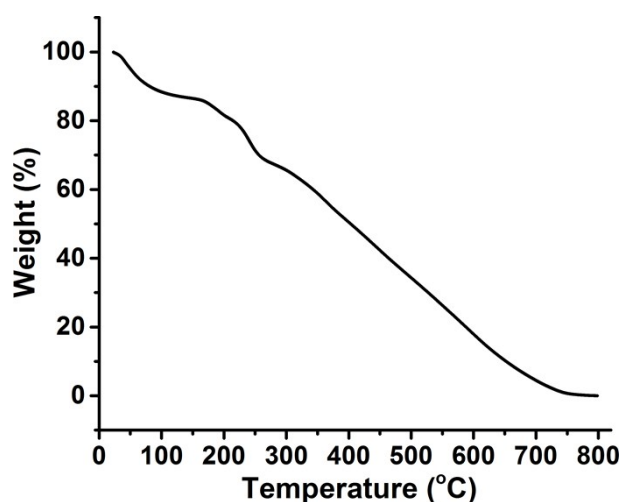

**Figure S6** TG curve of FJI-Y6

### Single-crystal X-ray data

Single-crystal X-ray data of  $\text{H}_2\text{L}^{2+}(\text{NO}_3)_2$ , *rac*- $\text{H}_2\text{L}^{2+}(\text{NO}_3)_2$ , **FJI-Y6** and *rac*-**FJI-Y6** were collected on a SuperNova, Dual, Cu at zero, Atlas diffractometer. Single-crystal X-ray data of **FJI-Y6** dye were collected at 290 K using graphite-monochromated Cu K $\alpha$  radiation ( $\lambda=1.54178\text{\AA}$ ) on a Bruker APEX-III CCD diffractometer. The crystals of  $\text{H}_2\text{L}^{2+}(\text{NO}_3)_2$ , *rac*- $\text{H}_2\text{L}^{2+}(\text{NO}_3)_2$  and **FJI-Y6** were directly put on the diffractometer and the data were collected under 100 K, 100 K and 200 K, respectively; *rac*-**FJI-Y6** and **FJI-Y6** dye were sealed in silica tube with mother liquid and were kept at 293 K and 290 K during data collection, respectively. The structures were solved by direct methods and refined by full-matrix least-squares on  $F^2$  with anisotropic displacement using the *SHELXTL*-2016 software package<sup>3</sup> The non-H atoms were treated anisotropically, whereas the aromatic and hydroxy- and alkyl-hydrogen atoms were placed in calculated, ideal positions and refined as riding on their respective carbon atoms. Free solvent molecules were highly disordered, and attempts to locate and refine the solvent peaks were unsuccessful. The diffused electron densities resulting from these residual solvent molecules were removed from the dataset using the SQUEEZE routine of PLATON and refined further using the data generated.<sup>4</sup> The contents of the solvent region are not represented in the unit cell contents in the crystal data. The details for data collection and refinement are included in the CIF file in the Supporting Information. The crystal structure refinement data were listed in Table S1. CCDC Number: 1586541, 1586542, 1822395-1822397.

Table S1. Crystal data and structure refinement for H<sub>2</sub>L<sup>2+</sup>(NO<sub>3</sub>)<sub>2</sub>, *rac*-H<sub>2</sub>L<sup>2+</sup>(NO<sub>3</sub>)<sub>2</sub>, FJI-Y6, *rac*-FJI-Y6 and FJI-Y6⊃dye

| Identification code                                 | H <sub>2</sub> L <sup>2+</sup> (NO <sub>3</sub> ) <sub>2</sub>                 | <i>rac</i> -H <sub>2</sub> L <sup>2+</sup> (NO <sub>3</sub> ) <sub>2</sub>     | FJI-Y6                                                                                | <i>rac</i> -FJI-Y6                                                                    | FJI-Y6⊃dye                                                                                      |
|-----------------------------------------------------|--------------------------------------------------------------------------------|--------------------------------------------------------------------------------|---------------------------------------------------------------------------------------|---------------------------------------------------------------------------------------|-------------------------------------------------------------------------------------------------|
| CCDC No.                                            | 1586542                                                                        | 1822397                                                                        | 1586541                                                                               | 1822396                                                                               | 1822395                                                                                         |
| Empirical formula                                   | C <sub>32</sub> H <sub>46</sub> Cu <sub>2</sub> N <sub>6</sub> O <sub>14</sub> | C <sub>32</sub> H <sub>38</sub> Cu <sub>2</sub> N <sub>6</sub> O <sub>14</sub> | C <sub>15</sub> H <sub>14</sub> CuIn <sub>0.50</sub> N <sub>3</sub> O <sub>6.67</sub> | C <sub>15</sub> H <sub>14</sub> CuIn <sub>0.50</sub> N <sub>3</sub> O <sub>6.67</sub> | C <sub>90</sub> H <sub>84</sub> Cu <sub>6</sub> In <sub>3</sub> N <sub>12</sub> O <sub>22</sub> |
| Formula weight                                      | 865.83                                                                         | 857.76                                                                         | 463.91                                                                                | 463.91                                                                                | 2411.39                                                                                         |
| <i>T</i> (K)                                        | 100.0(2)                                                                       | 99.9(5)                                                                        | 200.0(1)                                                                              | 293.0(2)                                                                              | 290.0(2)                                                                                        |
| $\lambda$ (Å)                                       | 1.54184                                                                        | 1.54184                                                                        | 1.54184 Å                                                                             | 1.54184 Å                                                                             | 1.54178 Å                                                                                       |
| Crystal system                                      | Monoclinic                                                                     | monoclinic                                                                     | hexagonal                                                                             | hexagonal                                                                             | trigonal                                                                                        |
| Space group                                         | <i>P</i> 2 <sub>1</sub>                                                        | <i>P</i> 2 <sub>1</sub> /c                                                     | <i>P</i> 6 <sub>3</sub> /mmc                                                          | <i>P</i> 6 <sub>3</sub> /mmc                                                          | <i>P</i> -3 <sub>1</sub> c                                                                      |
| <i>a</i> (Å)                                        | 8.73490(10)                                                                    | 8.70380(10)                                                                    | 21.8599(3)                                                                            | 22.8847(5)                                                                            | 23.0639(3)                                                                                      |
| <i>b</i> (Å)                                        | 13.3687(2)                                                                     | 13.4115(2)                                                                     | 21.8599(3)                                                                            | 22.8847(5)                                                                            | 23.0639(3)                                                                                      |
| <i>c</i> (Å)                                        | 15.7886(2)                                                                     | 15.6432(2)                                                                     | 30.9566(2)                                                                            | 30.1026(6)                                                                            | 30.1054(3)                                                                                      |
| $\alpha$ (°)                                        | 90                                                                             | 90                                                                             | 90                                                                                    | 90                                                                                    | 90                                                                                              |
| $\beta$ (°)                                         | 104.319(2)                                                                     | 103.055(2)                                                                     | 90                                                                                    | 90                                                                                    | 90                                                                                              |
| $\gamma$ (°)                                        | 90                                                                             | 90                                                                             | 120                                                                                   | 120                                                                                   | 120                                                                                             |
| <i>V</i>                                            | 1786.42(4)                                                                     | 1778.85(4)                                                                     | 12810.9(4)                                                                            | 13652.9(7)                                                                            | 13868.8(4)                                                                                      |
| <i>Z</i>                                            | 2                                                                              | 2                                                                              | 12                                                                                    | 12                                                                                    | 2                                                                                               |
| <i>D</i> <sub>calc</sub> (g/cm <sup>3</sup> )       | 1.610                                                                          | 1.601                                                                          | 0.722                                                                                 | 0.677                                                                                 | 0.577                                                                                           |
| $\mu$ (mm <sup>-1</sup> )                           | 2.143                                                                          | 2.151                                                                          | 2.986                                                                                 | 2.801                                                                                 | 2.664                                                                                           |
| <i>F</i> (000)                                      | 900                                                                            | 884                                                                            | 2782                                                                                  | 2782                                                                                  | 2410                                                                                            |
| Reflections collected                               | 6857                                                                           | 6962                                                                           | 50173                                                                                 | 31829                                                                                 | 101698                                                                                          |
| Independent reflections                             | 4913 [R(int) = 0.0238]                                                         | 3480 (Rint = 0.0178)                                                           | 4674 [R <sub>int</sub> = 0.0653]                                                      | 4987 (Rint = 0.1001)                                                                  | 9058 (Rint = 0.0526)                                                                            |
| Goodness-of-fit on <i>F</i> <sup>2</sup>            | 1.037                                                                          | 1.046                                                                          | 1.052                                                                                 | 1.037                                                                                 | 1.040                                                                                           |
| Final <i>R</i> indices [ <i>I</i> > 2σ( <i>I</i> )] | <i>R</i> 1 = 0.0401, <i>wR</i> 2 = 0.1089                                      | <i>R</i> 1 = 0.0342, <i>wR</i> 2 = 0.0838                                      | <i>R</i> 1 = 0.0758, <i>wR</i> 2 = 0.2052                                             | <i>R</i> 1 = 0.0604, <i>wR</i> 2 = 0.1780                                             | <i>R</i> 1 = 0.0597, <i>wR</i> 2 = 0.1815                                                       |
| <i>R</i> indices (all data)                         | <i>R</i> 1 = 0.0408, <i>wR</i> 2 = 0.1095                                      | <i>R</i> 1 = 0.0383, <i>wR</i> 2 = 0.0862                                      | <i>R</i> 1 = 0.1016, <i>wR</i> 2 = 0.2486                                             | <i>R</i> 1 = 0.0712, <i>wR</i> 2 = 0.1948                                             | <i>R</i> 1 = 0.0693, <i>wR</i> 2 = 0.1957                                                       |
| Absolute structure parameter                        | 0.00(3)                                                                        | -                                                                              | -                                                                                     | -                                                                                     | -                                                                                               |

## Dyes adsorption and release experiment

### Dye adsorption by FJI-Y6

6 mL  $8.33 \times 10^{-5} \text{ mol} \cdot \text{L}^{-1}$  DMF solution of dye was charged into a vial containing 10 mg **FJI-Y6**, then the UV-Vis absorbance measurements were performed periodically for the upper clear solution, which was poured back to the original system after each measurement to keep the total amount of sample constant. The absorbance at maximum wavelength was chosen to calculate the dye content of anion-exchange progress by the formula:

$$C(d) = A_t / A_0 \times 100\%$$

$C(d)$  is the content of the dye in solution;  $A_0$  is the absorbance of the tested at 0 h;  $A_t$  is the absorbance of the tested at the different time in the anion-exchange process.

### Dye release experiment

After complete adsorption of AO7, the release experiment was conducted by replacing the upper clear liquid with 6 mL DMF solution containing 170 mg (2 mmol)  $\text{NaNO}_3$ . The recycle experiment of adsorption and release was conducted for 5 cycles. UV-Vis was measured after completion of adsorption and release for each cycle.

### Ion-exchange capacity experiment

20 mg (21.6  $\mu\text{mol}$ ) MOF was added into 10 mL DMF contain 17.5 mg (50  $\mu\text{mol}$ ) AO7 (the molar ratio of  $\text{NO}_3^-:\text{SO}_3^- = 1:1$ ). The dye solution was diluted for UV-VIS measurement due to the high concentration of dye in solution. The screwed vial was put on a shaking bed to accelerate the exchange. 100  $\mu\text{L}$  the upper clear liquid was sucked out and diluted by 5.9 mL DMF for UV-Vis measurement. After exchanged for 1 d, about 13.9  $\mu\text{mol}$  AO7 was remained in the solution, about 72.2%  $\text{NO}_3^-$  was exchanged by AO7. After exchanged for 2 d, about 12.03  $\mu\text{mol}$  AO7 remained in the solution, about 75.9%  $\text{NO}_3^-$  was exchanged by AO7 (Fig. S22). The crystallinity was also maintained according to the PXRD (Fig. S23).

Abbreviation for those dyes:  $\text{MLB}^+$  = Methylene blue, SD I = Sudan I, AR88 $^-$  = Acid red 88, AO7 $^-$  = Acid orange 7, AB1 $^{2-}$  = Acid black, OG $^{2-}$  = Orange G, CS3B $^{2-}$  = Crocein scarlet 3B, MB $^{2-}$  = Methyl blue, Amar $^{3-}$  = Amaranth. The dimensions of the dyes are defined as  $x \times y \times z$  ( $x \leq y \leq z$ ) according to the literature.<sup>5-7</sup>



**Table S2.** The dimensions of the dye molecules

| Abbr.  | MLB    | SD I   | AR88   | AO7    | AB1    | OG     | CS3B   | MB     | Amar   |
|--------|--------|--------|--------|--------|--------|--------|--------|--------|--------|
| charge | +1     | 0      | -1     | -1     | -2     | -2     | -2     | -2     | -3     |
| Mw     | 284.40 | 248.28 | 377.39 | 327.33 | 570.51 | 406.38 | 510.50 | 753.82 | 604.47 |
| x(Å)   | 4.00   | 3.68   | 5.44   | 5.44   | 5.44   | 5.44   | 5.44   | 13.89  | 7.72   |
| y(Å)   | 7.93   | 9.74   | 10.27  | 10.03  | 11.55  | 10.14  | 10.61  | 14.35  | 10.45  |
| z(Å)   | 16.34  | 13.55  | 15.66  | 15.67  | 22.93  | 15.64  | 21.81  | 24.49  | 14.34  |

The molecule structure of dyes utilized as follow:

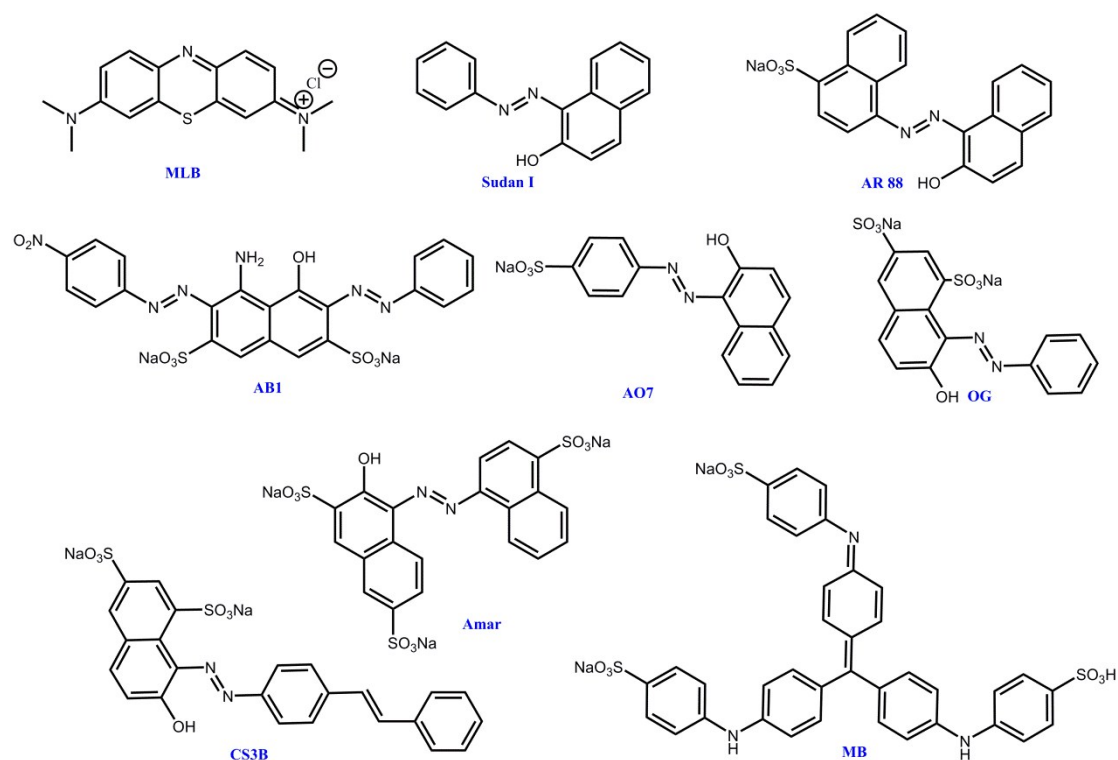**Scheme S2** The molecule structure of dyes.

## UV-Vis absorption spectra changes of dyes in presence of FJI-Y6

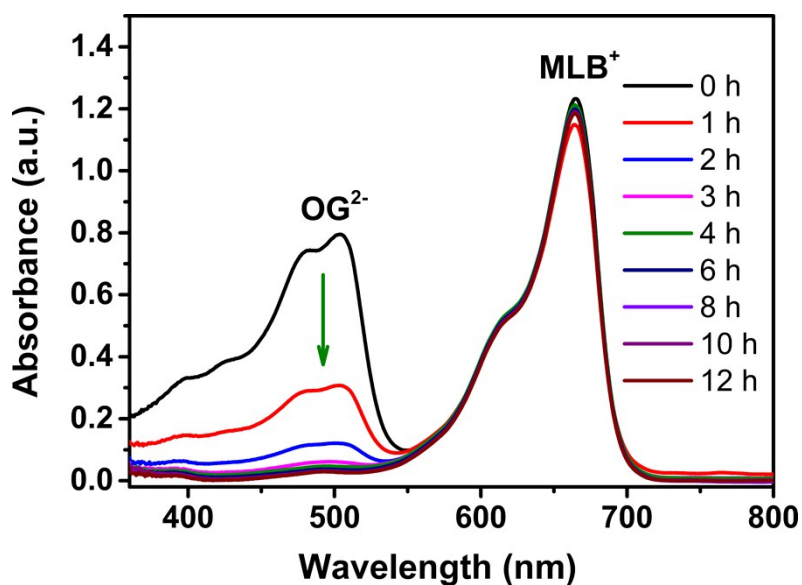

**Figure S7** The UV-Vis absorption spectral changes of the mixture solution of  $\text{OG}^{2-}$  and  $\text{MLB}^+$  in the presence of **FJI-Y6**

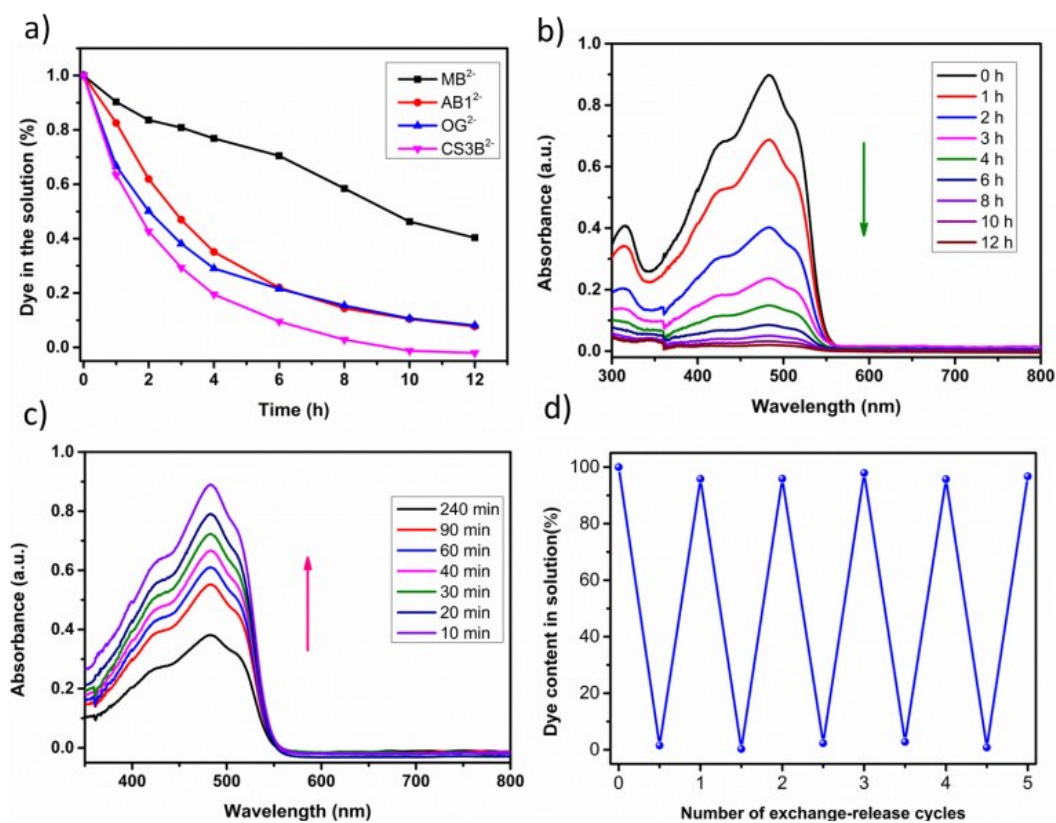

**Figure S8** a) The content of anionic dyes in diverse size in the solution monitored with time in the presence of **FJI-Y6**. b) UV-Vis spectra monitored with time during the loading process of  $\text{AO7}^-$  for **FJI-Y6**. c) UV-Vis spectra monitored with time during the release process of  $\text{AO7}^-$  for **FJI-Y6**. d) Number of load-release cycles.

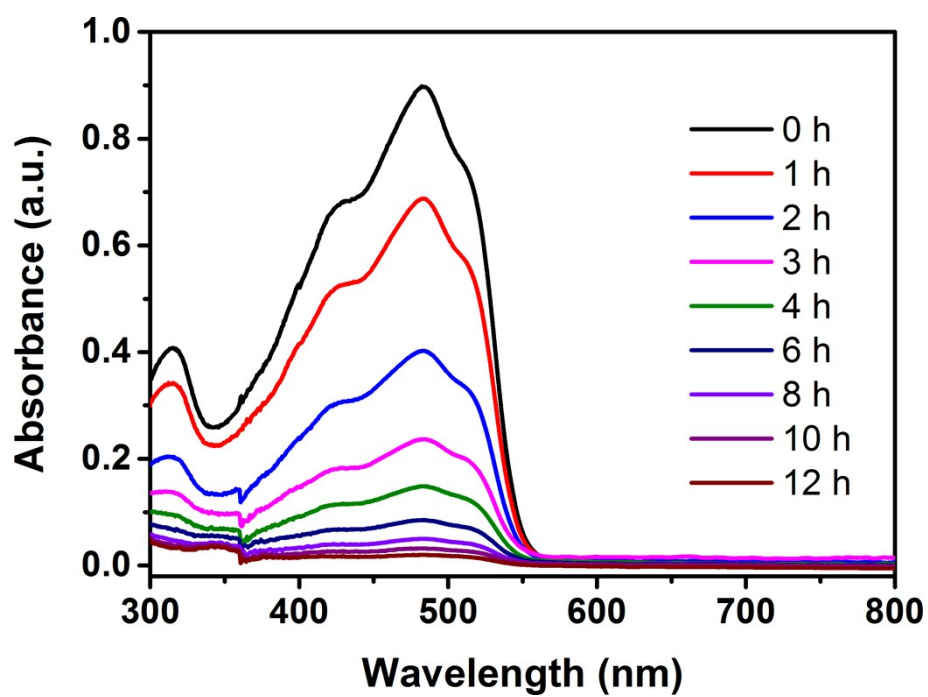

**Figure S9** The UV-Vis absorption spectral changes of AO7 in the presence of **FJI-Y6**

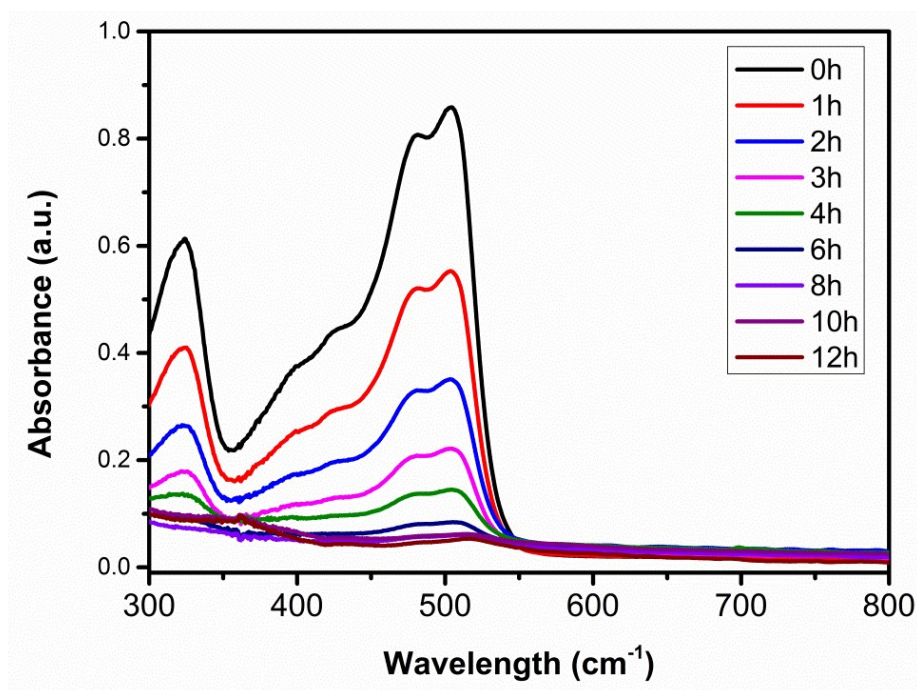

**Figure S10** The UV-Vis absorption spectral changes of OG in the presence of **FJI-Y6**

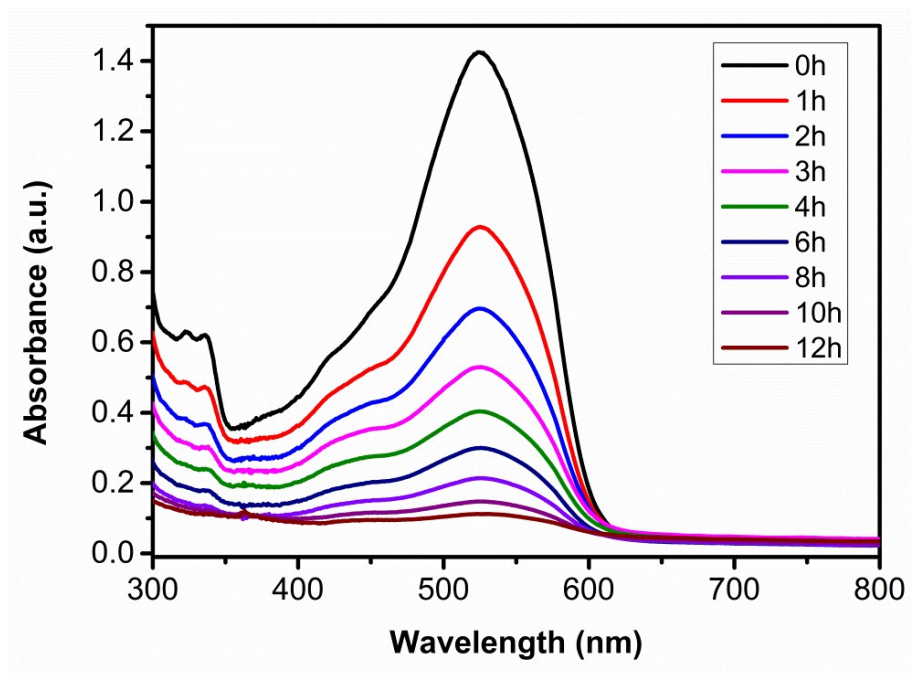

**Figure S11** The UV-Vis absorption spectral changes of AMAR in the presence of **FJI-Y6**

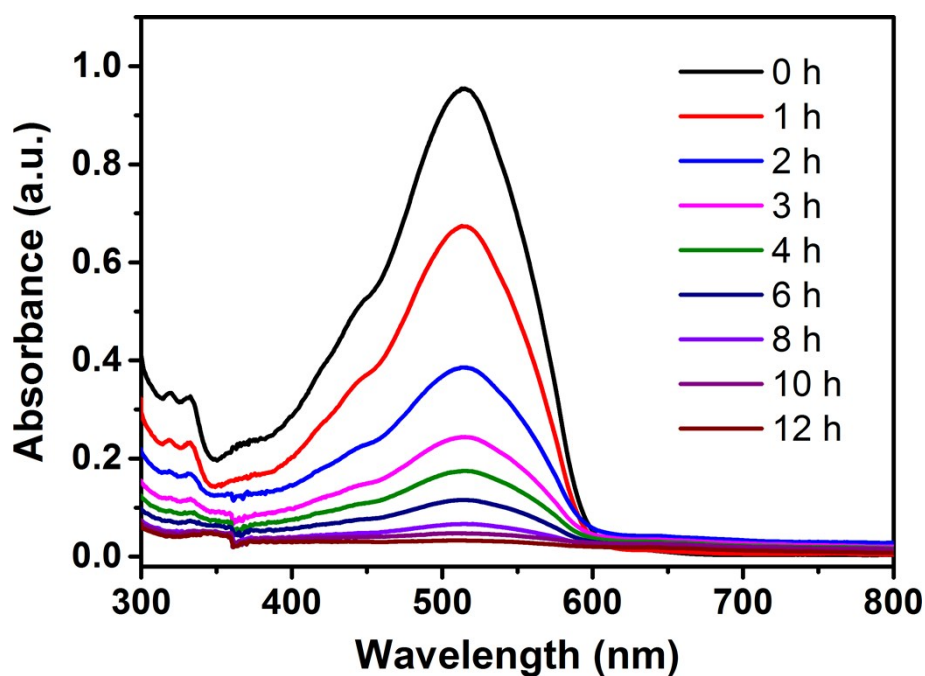

**Figure S12** The UV-Vis absorption spectral changes of AR88 in the presence of **FJI-Y6**

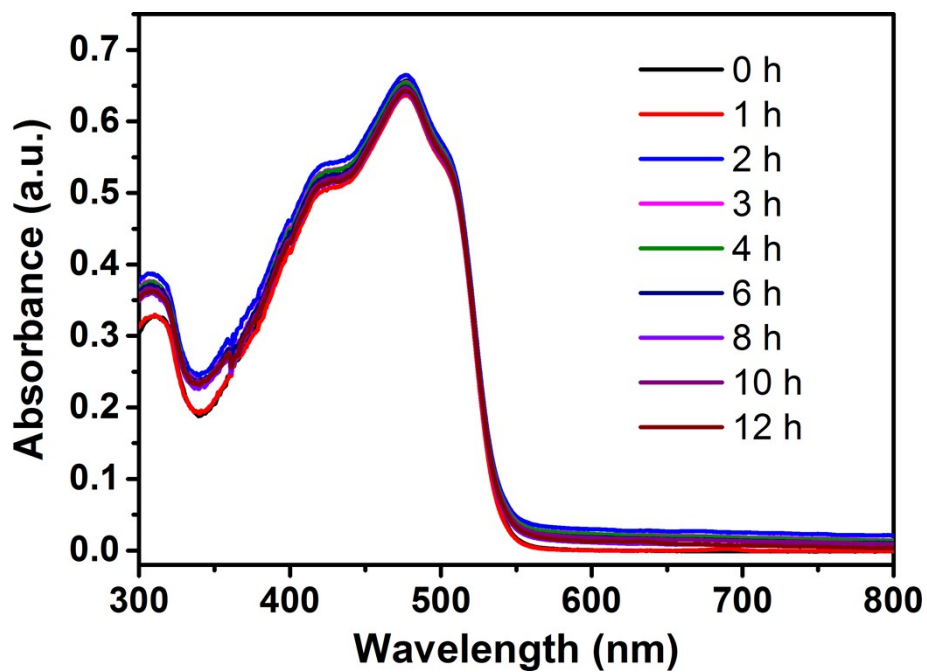

**Figure S13** The UV-Vis absorption spectral changes of Sudan I in the presence of FJI-Y6

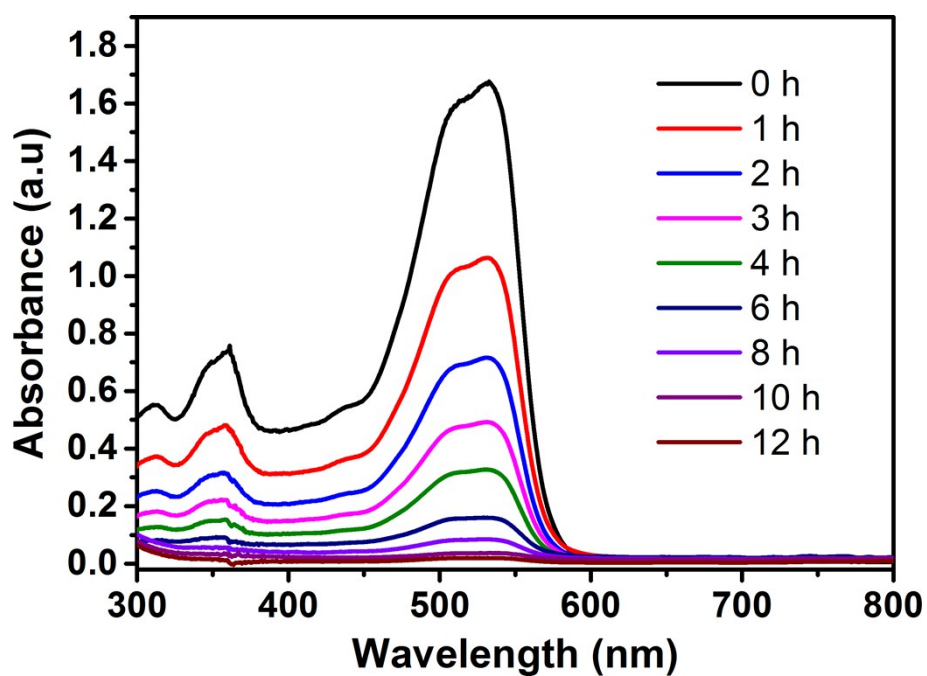

**Figure S14** The UV-Vis absorption spectral changes of CS3B in the presence of FJI-Y6



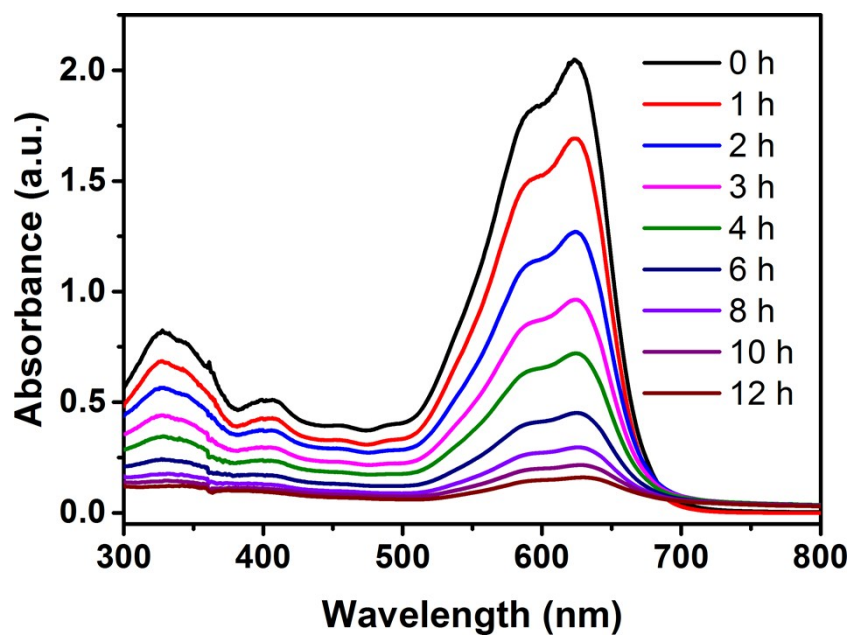

**Figure S15** The UV-Vis absorption spectral changes of AB1 in the presence of **FJI-Y6**

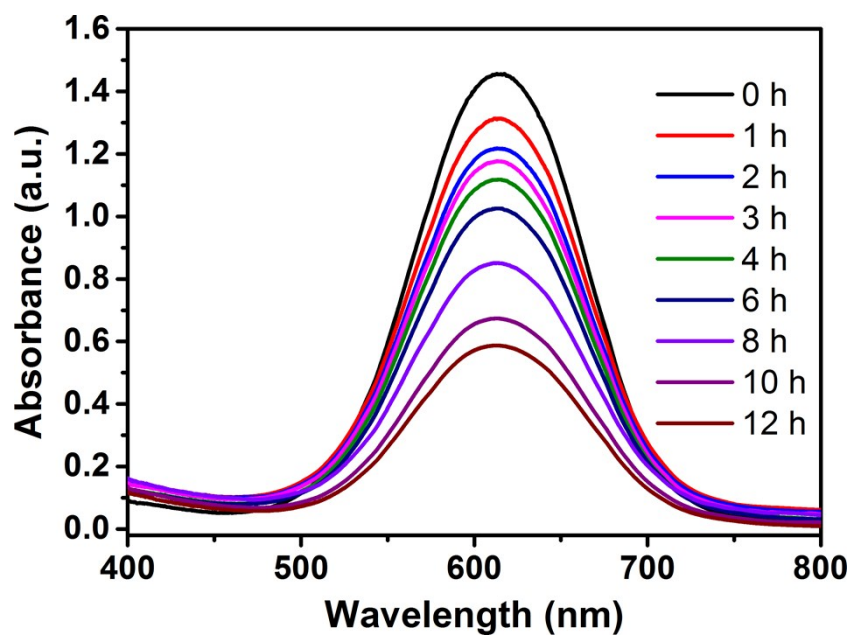

**Figure S16** The UV-Vis absorption spectral changes of MB in the presence of **FJI-Y6**

**Photo, IR, UV-Vis spectrum and PXRD of FJI-Y6 after dyes adsorption**

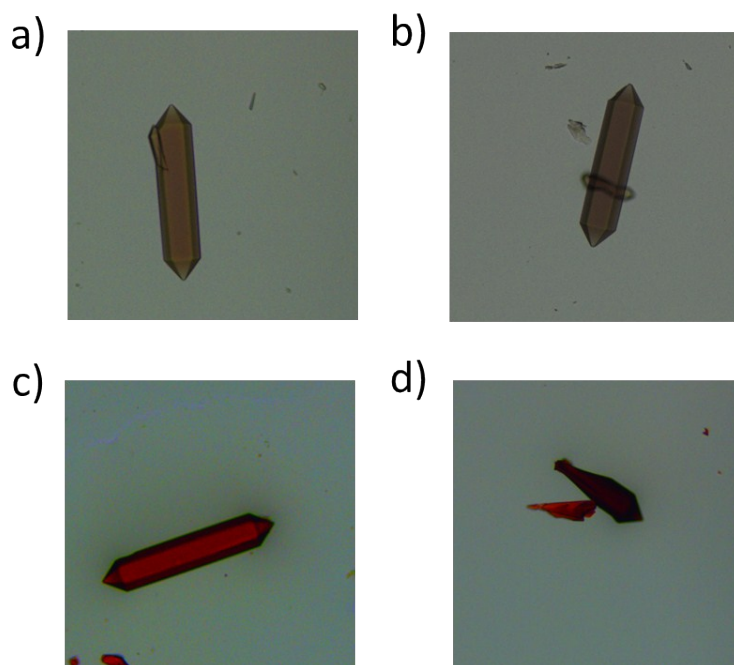

**Figure S17** The photographs of FJI-Y6 crystal before and after dye-exchange, the crystal after dye-adsorption was washed with DMF for few times before took a photo under a microscope. a) Fresh sample. b) After exchanged with SDI. c) After exchanged with AO7. d) After exchanged with OG.

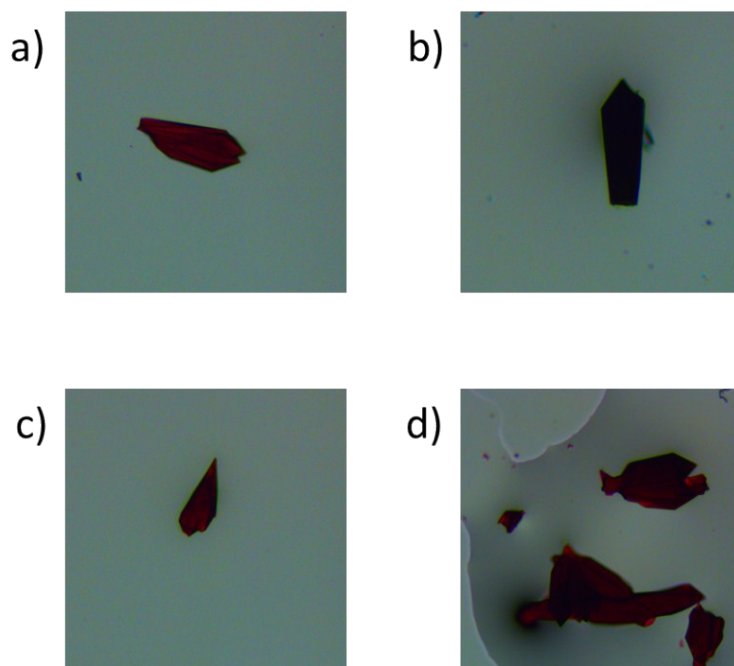

**Figure S18** The photographs of FJI-Y6 crystal after dye-exchange, the crystal after

dye-adsorption was washed with DMF for few times before took a photo under a microscope. a) After exchanged with AMAR. b) After exchanged AB10B. c) After exchanged with CS3B. d) After exchanged with AR88.

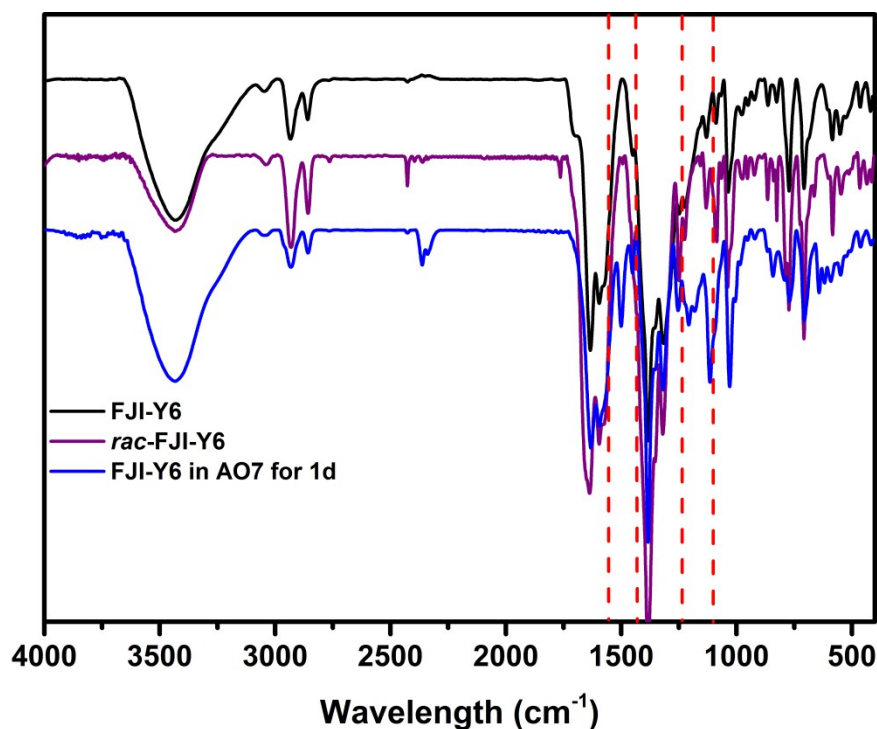

**Figure S19** The FT-IR spectrum of FJI-Y6, *rac*-FJI-Y6 and FJI-Y6 after exchanged with AO7<sup>-</sup> for 1 d (after washed by DMF for several times) from top to bottom, respectively. The peak around 1490 cm<sup>-1</sup> corresponds to the N=N group in AO7<sup>-</sup>. The peak around 1200 cm<sup>-1</sup> and 1110 cm<sup>-1</sup> correspond to the -SO<sub>3</sub><sup>-</sup> group in AO7<sup>-</sup>.

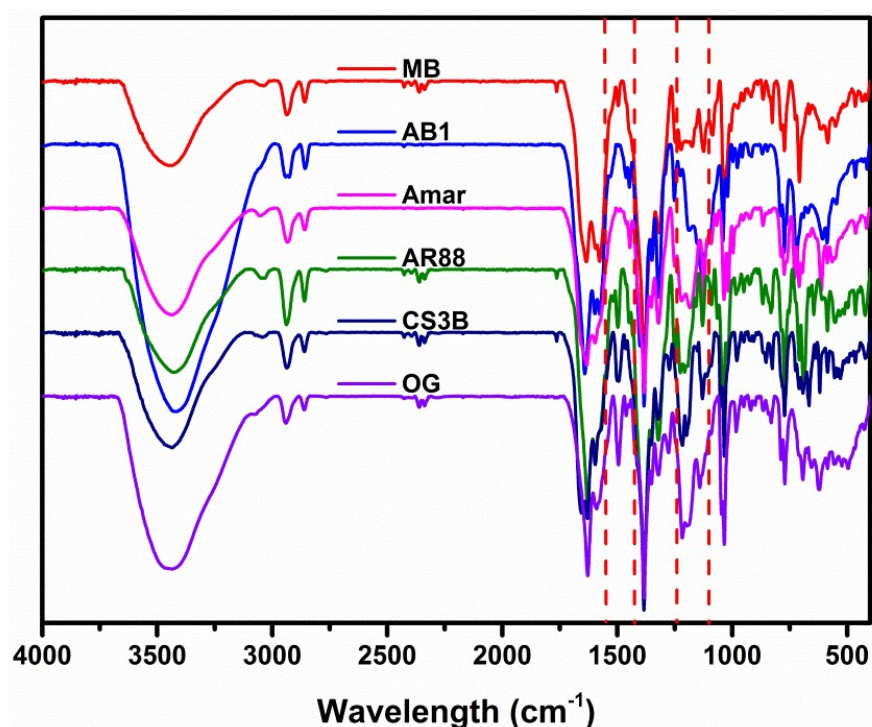



**Figure S20** The FT-IR spectrum of FJI-Y6 after exchanged with MB, AB1, Amar, AR88, CS3B and OG for 1 d respectively (after washed by DMF for several times).

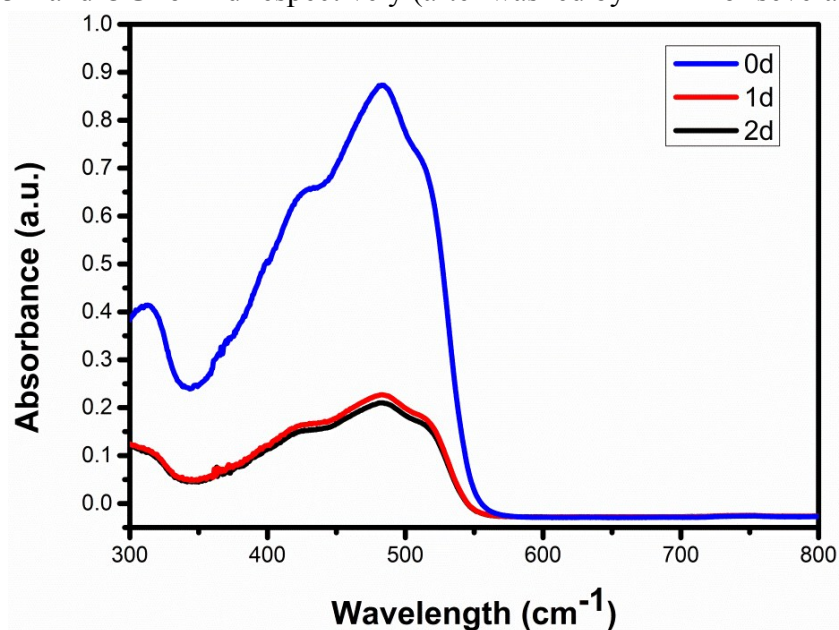

**Figure S21** The UV-Vis absorption spectral changes of diluted AO7 solution in the presence of FJI-Y6

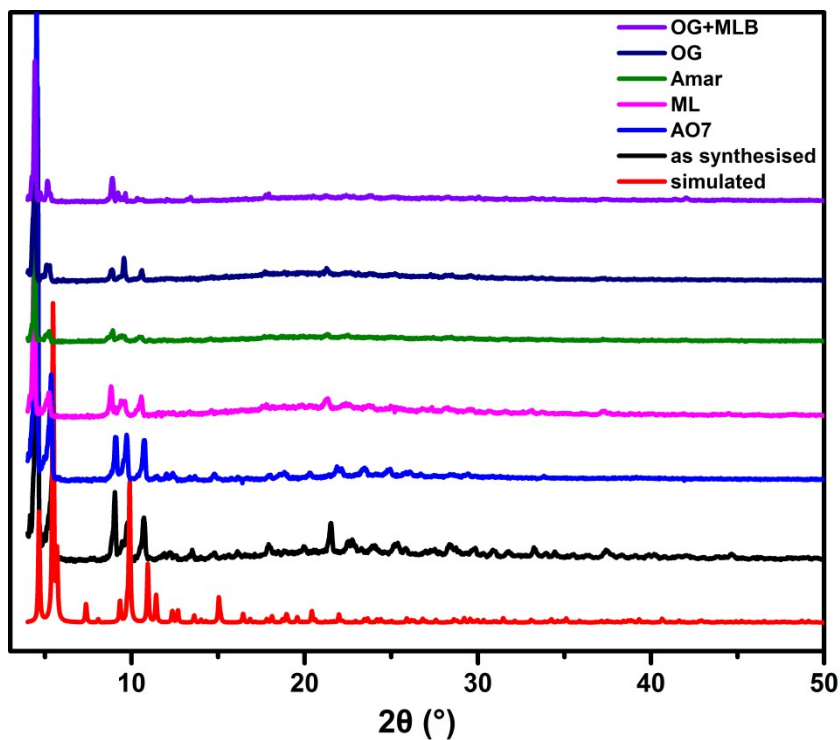

**Figure S22** The PXRD of FJI-Y6 after dyes adsorption

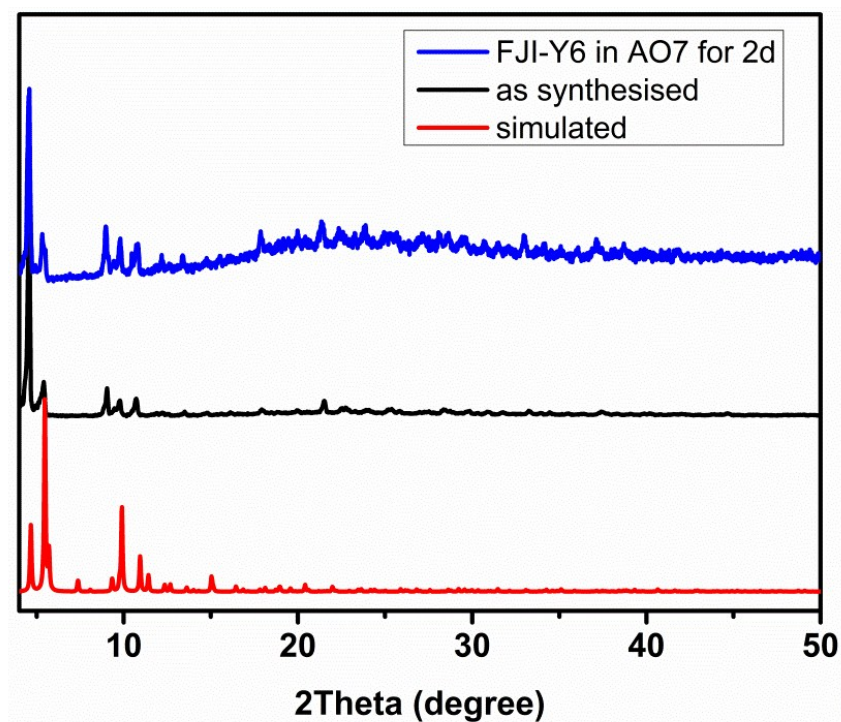

**Figure S23** The PXRD of FJI-Y6 after immersed in high concentration AO7 solution for 2 d.

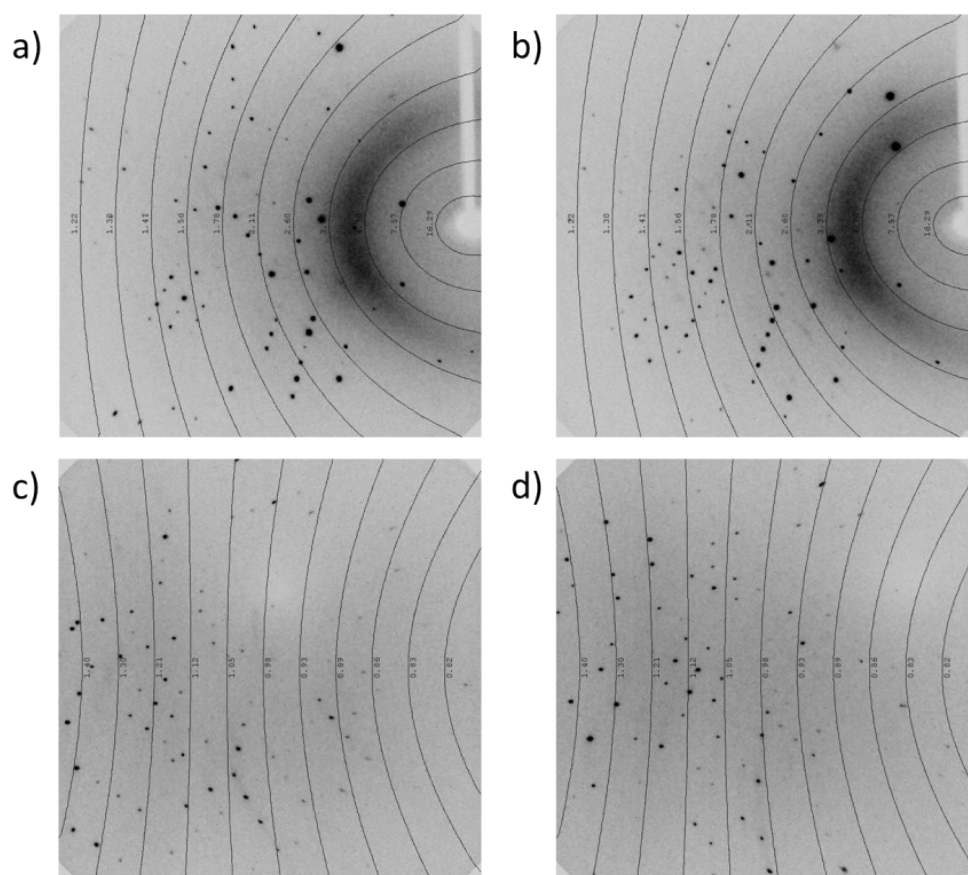

**Figure S24** The diffraction frames of FJI-Y6 after loaded AO7

## Additional Structure figures

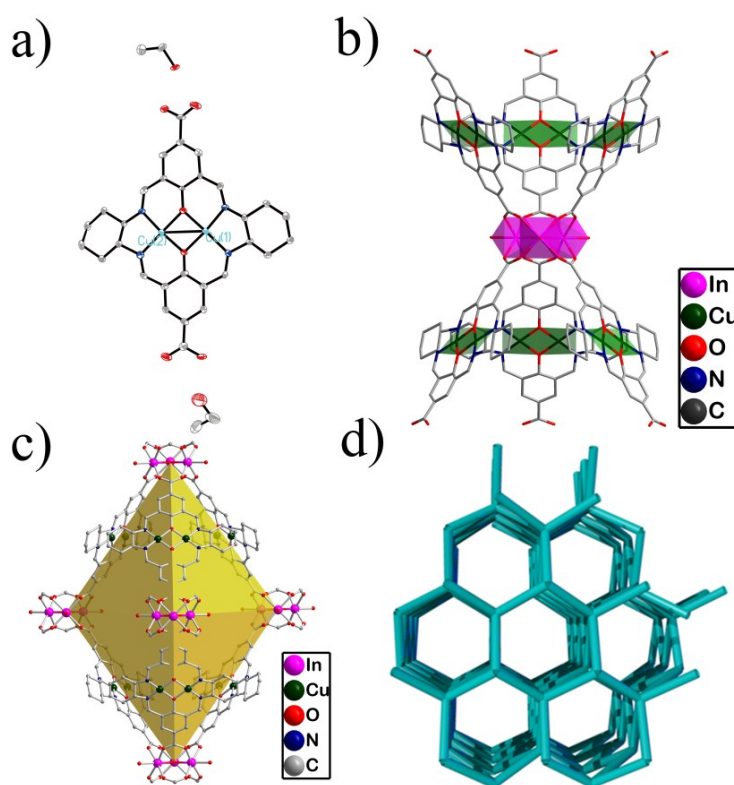

**Figure S25** a) The structure of ligand. b) Six ligands coordinate with  $\text{In}_3\text{O}(\text{CO}_2)_6(\text{H}_2\text{O})_3^+$ . c) The trigonal bipyramid cages in FJI-Y6. d) The simplified *acs* topology of FJI-Y6

## Reference

1. L. F. Lindoy, G. V. Meehan and N. Svenstrup, *Synthesis*, 1998, 1029-1032.
2. T. Routasalo, J. Helaja, J. Kavakka and A. M. P. Koskinen, *Eur. J. Org. Chem.*, 2008, 3190-3199.
3. G. M. Sheldrick, *Acta Crystallogr. A*, 2008, **64**, 112-122.
4. A. L. Spek, *J. Appl. Crystallogr.*, 2003, **36**, 7-13.
5. X. Zhao, X. Bu, T. Wu, S. T. Zheng, L. Wang and P. Feng, *Nat. Commun.*, 2013, **4**, 2344.
6. B. Q. Song, X. L. Wang, Y. T. Zhang, X. S. Wu, H. S. Liu, K. Z. Shao and Z. M. Su, *Chem. Commun.*, 2015, **51**, 9515-9518.
7. J. A. Johnson, X. Zhang, T. C. Reeson, Y. S. Chen and J. Zhang, *J. Am. Chem. Soc.*, 2014, **136**, 15881-15884.
